# Supplementary material for: A Quantitative Dynamic Simulation of Bremia lactucae Airborne Conidia Concentration above a Lettuce Canopy
Source: PLoS One. 2016 Mar 8;11(3):e0144573. doi: 10.1371/journal.pone.0144573 (PMC4783011; doi:10.1371/journal.pone.0144573)
Supplement: S1 Dataset — (XLS) [file pone.0144573.s001.xls]

## Sheet: Feuil1
Year	Observed	Simulated		Hour.Ex1	Observed1	Simulated1		Hour.Ex2	Observed2	Simulated2		Hour.Ex3	Observed3	Simulated3		Hour.Ex4	Observed4	Simulated4
97	0	0		0	10	0		0	2.1	0		0	1.7	0		0	13.3	0
97	0	0		1	11.3	0		1	9.2	0.2		1	5	0.4		1	9.2	1
97	4046.7	4812.6		2	7.9	#########################		2	7.1	0.9		2	0.8	2.3		2	3.8	4.4
97	1700	3.1		3	8.8	#########################		3	13.3	2.6		3	2.5	6.3		3	2.9	12.6
97	1653.3	54.6		4	8.8	#########################		4	17.9	6.8		4	0.8	13.1		4	7.5	27.3
97	0	0		5	10.4	#########################		5	16.7	12.6		5	4.2	28.2		5	4.2	45
97	0	0		6	15.4	3		6	35.8	25.5		6	3.3	53.5		6	13.3	71.2
97	5127.5	1897.5		7	13.8	6.5		7	40.8	56.2		7	2.5	50.4		7	6.7	113.5
97	3785.8	23.3		8	11.7	12.3		8	46.7	62.7		8	1.9	47.3		8	27.1	180
97	9963.3	4157.9		9	12.1	90.8		9	34.2	52.6		9	10.5	65.2		9	5.4	377.1
97	12127.9	11916.9		10	222	324.3		10	26.7	46.1		10	12.5	69.8		10	37.5	661.3
97	4877.1	120		11	0	0		11	37.5	39.7		11	107.1	155.7		11	56.7	740.2
98	35.8	12.4		12	0	0		12	15.8	31.7		12	42.5	128.4		12	86.7	705.2
98	112.5	1056.9		13	0	0		13	23.3	28.5		13	45.4	108.3		13	23.3	583.9
98	100.8	1452.1		14	441.7	591.2		14	27.1	24.4		14	35.8	95		14	31.7	437.5
98	110	351		15	269.2	514.7		15	22.9	18.3		15	29.2	91.4		15	42.5	329.9
98	137.1	90		16	260	435.6		16	14.2	14		16	44.6	81.5		16	10	289.4
98	172.5	3392.5		17	169.2	292		17	5.4	11.8		17	7.5	65.2		17	7.5	234.5
98	80.8	19.5		18	75.4	195.5		18	4.6	9.2		18	4.2	49.3		18	5	136.1
98	23.3	#########################		19	119.6	172.5		19	1.7	6.4		19	3.8	37.4		19	3.3	86.9
98	257.1	1310.4		20	63.3	136.2		20	1.7	4.1		20	2.9	24.9		20	8.3	109.4
98	516.7	9438.6		21	26.7	102.6		21	0.8	2.3		21	1.7	13.8		21	15.4	117.8
98	2711.7	22028.1		22	22.9	102		22	2.5	1.6		22	3.8	9.6		22	22.9	102.2
98	202.9	1872.9		23	18.3	98		23	7.5	1.6		23	2.9	8.7		23	13.3	83.3
98	825.4	835.4
98	943.3	5106.7
98	2255	18759.9
98	1932.1	18339.1
98	255	66.9
98	922.5	2448.7
98	813.3	6303.8
98	0.8	112.1
98	502.9	1963.6
98	189.6	1.5
2003	116.7	99
2003	54.2	45.4
2003	437.5	3635.8
2003	425.8	6551.5
2003	526.7	4065.7
2003	1574.6	4394.2
2003	0	0
2003	244.2	56.8
2003	223.3	5.7
2003	2424.6	29826.7
2003	1030.3	4064.9
2003	158.5	62.8
2003	113.3	38.5
2003	70.8	3.4
2003	46.3	1561.2
2003	33.8	131.5
2003	178.3	3136.3
2003	34.2	158.4
2003	302.9	80.9
2003	630.2	1135
2003	65.8	236.1
2003	60.4	21
2004	165.8	28.6
2004	132.9	1903.8
2004	325.8	2487.6
2004	530	5153.7
2004	415.4	459.7
2004	457.5	5449.6
2004	272.1	313.9
2004	442.9	20504.4
2004	1240	33464.1
2004	316.7	2344.6
2004	230.8	2088.3
2004	245.8	4065
2004	299.2	1657.9
2004	340.4	3213.1
2004	394.6	1642
2004	327.1	1257.8
2004	86.3	778
2004	88.3	1785.7
2004	37.1	2700.1
2004	84.6	817.4
2004	55.8	749.4
2004	179.2	212.7
2004	165	3086.7
2004	271.3	5012.5
2004	117.5	485.4
2004	202.5	25.3
2004	816.3	4711.3
2004	1891.3	37869.6
2004	460.8	2348.3
2004	340	3851.7
2004	499.2	893.2
